# Supplementary material for: Cu single atoms on Ti2CO2 as a highly efficient oxygen reduction catalyst in a proton exchange membrane fuel cell
Source: Royal Society of Chemistry journal article supplement (doi:10.1039/c9ta08297b), 2019-01-01
Supplement: c9ta08297b1.pdf [file c9ta08297b1.pdf]

## Supporting Information

### **Cu single-atom on Ti<sub>2</sub>CO<sub>2</sub> as high efficient oxygen reduction catalyst in proton exchange membrane fuel cell**

Qiong Peng, Jian Zhou\*, Jiatian Chen, Tian Zhang, Zhimei Sun\*

*School of Materials Science and Engineering, Beihang University, Beijing 100191, China*

*Center for Integrated Computational Materials Engineering, International Research Institute for  
Multidisciplinary Science, Beihang University, Beijing 100191, China*

\*Corresponding Authors: [jzhou@buaa.edu.cn](mailto:jzhou@buaa.edu.cn) (Jian Zhou), [zmsun@buaa.edu.cn](mailto:zmsun@buaa.edu.cn) (Zhimei Sun)

## Calculation details for adsorption free energy and reaction free energy

In proton exchange membrane fuel cell, the cathode is a place for O<sub>2</sub> reduction, where the overall reaction is: O<sub>2</sub>(g) + 4H<sup>+</sup> + 4e<sup>-</sup> → 2H<sub>2</sub>O, composed of four elementary steps:

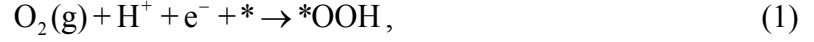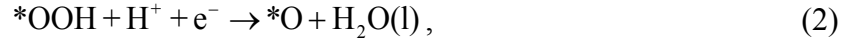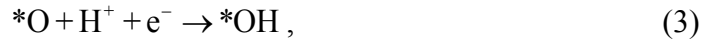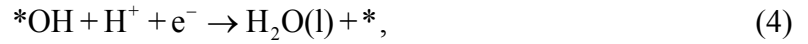

where \* is the active site on the catalytic surface. (g) and (l) correspond to the gas and liquid phases, respectively. According to the reversible hydrogen electrode (RHE) model proposed by Nørskov et al,<sup>1</sup> the chemical potential ( $\mu$ ) of a proton-electron pair is equivalent to that of half a H<sub>2</sub> molecule:  $\mu_{\text{H}^+} + \mu_{\text{e}^-} = 0.5\mu_{\text{H}_2}$ , at U= 0 V and  $P_{\text{H}_2} = 1$  bar. Based on the definition of chemical potential  $\mu = E + \text{ZPE} - T \times S$  ( $E$  is the total energy achieved from DFT calculations, ZPE is zero-point energy and  $S$  is the entropy at 298 K), the adsorption free energy of the ORR intermediates ( $\Delta G_{* \text{OOH}}$ ,  $\Delta G_{* \text{O}}$  and  $\Delta G_{* \text{OH}}$ ) are derived from the following formulas,

$$\begin{aligned} \Delta G_{* \text{OOH}} &= \Delta G(2\text{H}_2\text{O}(\text{g}) + * \rightarrow * \text{OOH} + 1.5\text{H}_2(\text{g})) = \mu_{* \text{OOH}} + 1.5\mu_{\text{H}_2} - 2\mu_{\text{H}_2\text{O}} - \mu_* \\ &= (E_{* \text{OOH}} + 1.5 \times E_{\text{H}_2} - 2 \times E_{\text{H}_2\text{O}} - E_*) + (\text{ZPE}_{* \text{OOH}} + 1.5 \times \text{ZPE}_{\text{H}_2} - 2 \times \text{ZPE}_{\text{H}_2\text{O}} - \text{ZPE}_*) \\ &\quad - T \times (S_{* \text{OOH}} + 1.5 \times S_{\text{H}_2} - 2 \times S_{\text{H}_2\text{O}} - S_*) \end{aligned} \quad (5)$$

$$\begin{aligned} \Delta G_{* \text{O}} &= \Delta G(\text{H}_2\text{O}(\text{g}) + * \rightarrow * \text{O} + \text{H}_2(\text{g})) = \mu_{* \text{O}} + \mu_{\text{H}_2} - \mu_{\text{H}_2\text{O}} - \mu_* \\ &= (E_{* \text{O}} + E_{\text{H}_2} - E_{\text{H}_2\text{O}} - E_*) + (\text{ZPE}_{* \text{O}} + \text{ZPE}_{\text{H}_2} - \text{ZPE}_{\text{H}_2\text{O}} - \text{ZPE}_*) - T \times (S_{* \text{O}} + S_{\text{H}_2} - S_{\text{H}_2\text{O}} - S_*) \end{aligned} \quad (6)$$

$$\begin{aligned} \Delta G_{* \text{OH}} &= \Delta G(\text{H}_2\text{O}(\text{g}) + * \rightarrow * \text{OH} + 0.5\text{H}_2(\text{g})) = \mu_{* \text{OH}} + 0.5\mu_{\text{H}_2} - \mu_{\text{H}_2\text{O}} - \mu_* \\ &= (E_{* \text{OH}} + 0.5 \times E_{\text{H}_2} - E_{\text{H}_2\text{O}} - E_*) + (\text{ZPE}_{* \text{OH}} + 0.5 \times \text{ZPE}_{\text{H}_2} - \text{ZPE}_{\text{H}_2\text{O}} - \text{ZPE}_*) \end{aligned}$$

$$-T \times (S_{*_{\text{OH}}} + 0.5 \times S_{\text{H}_2} - S_{\text{H}_2\text{O}} - S_*) \quad (7)$$

The ZPE for each adsorbate and gaseous molecules can be obtained from the vibration frequency calculation, while the ZPE of substrates is negligible. Notably, for the same adsorbate on different supports, the ZPE shows the same value since they have rather close value.<sup>2</sup> Entropy results of free molecules are taken the standard thermodynamic tables,<sup>3</sup> while the entropies of adsorbate and substrate are negligible. All the ZPE and entropy values are summarized in Table S1. In formulas (5-7), gas-phase H<sub>2</sub>O and H<sub>2</sub> were used as reference states because they are readily treated in the DFT calculations. In contrast, the high-spin ground state of O<sub>2</sub> is poorly described in DFT calculations, thus the free energy of the O<sub>2</sub>(g) was derived based on the equation of  $G_{\text{O}_2(\text{g})} = 2G_{\text{H}_2\text{O}(\text{l})} - 2G_{\text{H}_2} + 4.92$  eV.<sup>4</sup> The free energy of OH<sup>-</sup> was obtained by  $G_{\text{OH}^-} = G_{\text{H}_2\text{O}(\text{l})} - G_{\text{H}^+}$ . The free energy for gas phase H<sub>2</sub>O(g) is calculated at 0.035 bars because this is the equilibrium pressure of H<sub>2</sub>O at 298 K. The free energy of this state is equal to that of liquid H<sub>2</sub>O(l).

The reaction free energy from initial state to final state is defined as:

$$\Delta G = \Delta E + \Delta \text{ZPE} - T\Delta S + \Delta G_{\text{pH}} + \Delta G_U, \quad (8)$$

where  $\Delta E$  is the total energy change achieved from DFT calculations.  $\Delta \text{ZPE}$  and  $\Delta S$  are the change in zero-point energy and entropy owing to the reaction, respectively.  $\Delta G_{\text{pH}} = -k_{\text{B}}T \ln[\text{H}^+] = \text{pH} \times k_{\text{B}}T \ln 10$ , owing to the effect of pH value of the electrolyte. The bias effect on the free energy  $\Delta G_U = -neU$ , where  $U$  is the applied electrode potential,  $e$  is the transferred charge, and  $n$  is the number of proton-electron transferred pairs. Eventually, for each ORR elementary step in equation (1-4), the reaction free energy ( $\Delta G_1$ ,  $\Delta G_2$ ,  $\Delta G_3$  and  $\Delta G_4$ ) is derived as:

$$\begin{aligned} \Delta G_1 &= \mu_{*_{\text{OOH}}} + \mu_{\text{OH}^-} - \mu_{\text{H}_2\text{O}} - \mu_* - \mu_{\text{O}_2} - \mu_{\text{e}^-} \\ &= \mu_{*_{\text{OOH}}} + (\mu_{\text{H}_2\text{O}} - \mu_{\text{H}^+}) - \mu_{\text{H}_2\text{O}} - \mu_* - (2\mu_{\text{H}_2\text{O}} - 2\mu_{\text{H}_2} + 4 \times 1.23) - \mu_{\text{e}^-} \end{aligned}$$

$$\begin{aligned}
&= \mu_{*OOH} + 1.5\mu_{H_2} - 2\mu_{H_2O} - \mu_* - 4.92 \\
&= \Delta G_{*OOH} - 4.92
\end{aligned} \tag{9}$$

$$\begin{aligned}
\Delta G_2 &= \mu_{O^*} + \mu_{OH^-} - \mu_{*OOH} - \mu_{e^-} \\
&= \mu_{O^*} + (\mu_{H_2O} - \mu_{H^+}) - \mu_{*OOH} - \mu_{e^-} \\
&= \mu_{O^*} + \mu_{H_2O} - 0.5\mu_{H_2} - \mu_{*OOH} \\
&= (\mu_{O^*} + \mu_{H_2} - \mu_{H_2O} - \mu_*) - (\mu_{*OOH} + 1.5\mu_{H_2} - 2\mu_{H_2O} - \mu_*) \\
&= \Delta G_{O^*} - \Delta G_{*OOH}
\end{aligned} \tag{10}$$

$$\begin{aligned}
\Delta G_3 &= \mu_{*OH} + \mu_{OH^-} - \mu_{O^*} - \mu_{H_2O} - \mu_{e^-} \\
&= \mu_{*OH} + (\mu_{H_2O} - \mu_{H^+}) - \mu_{O^*} - \mu_{H_2O} - \mu_{e^-} \\
&= \mu_{*OH} - 0.5\mu_{H_2} - \mu_{O^*} \\
&= (\mu_{*OH} + 0.5\mu_{H_2} - \mu_{H_2O} - \mu_*) - (\mu_{O^*} + \mu_{H_2} - \mu_{H_2O} - \mu_*) \\
&= \Delta G_{*OH} - \Delta G_{O^*}
\end{aligned} \tag{11}$$

$$\begin{aligned}
\Delta G_4 &= \mu_{OH^-} + \mu_* - \mu_{*OH} - \mu_{e^-} \\
&= (\mu_{H_2O} - \mu_{H^+}) + \mu_* - \mu_{*OH} - \mu_{e^-} \\
&= \mu_{H_2O} - 0.5\mu_{H_2} + \mu_* - \mu_{*OH} \\
&= -(\mu_{*OH} + 0.5\mu_{H_2} - \mu_{H_2O} - \mu_*) \\
&= -\Delta G_{*OH}
\end{aligned} \tag{12}$$

## Tables

**Table S1.** Values used of the DFT total energy ( $E_{\text{tot}}$ ), zero-point energy (ZPE) corrections and entropic contribution (TS,  $T = 298.15$  K) to the free energy. For the same adsorbate, the ZPE takes the same value since they have rather close value even on different substrates. Entropy values of free molecules are taken from the standard thermodynamic tables, while the entropies of adsorbate and substrate are negligible.

| Species          | $E_{\text{tot}}$ (eV) | ZPE (eV) | TS (eV) |
|------------------|-----------------------|----------|---------|
| H <sub>2</sub> O | -14.22                | 0.57     | 0.67    |
| H <sub>2</sub>   | -6.77                 | 0.27     | 0.40    |
| O <sub>2</sub>   | -9.86                 | 0.10     | 0.63    |
| O <sub>2</sub> * | -                     | 0.16     | 0       |
| O*               | -                     | 0.07     | 0       |
| OH*              | -                     | 0.36     | 0       |
| OOH*             | -                     | 0.42     | 0       |

**Table S2.** The valence electrons ( $\varphi_{\text{M}}^{\text{anchored}}$ ) and electronegativity ( $\chi_{\text{M}}^{\text{anchored}}$ ) of 3d, 4d and 5d transition-metals as well as the electronegativity ( $\chi$ ) of O, C and N atoms.

| atom | $\varphi_{\text{M}}^{\text{anchored}}$ | $\chi_{\text{M}}^{\text{anchored}}$ | atom | $\varphi_{\text{M}}^{\text{anchored}}$ | $\chi_{\text{M}}^{\text{anchored}}$ | atom | $\varphi_{\text{M}}^{\text{anchored}}$ | $\chi_{\text{M}}^{\text{anchored}}$ | atom | $\chi$ |
|------|----------------------------------------|-------------------------------------|------|----------------------------------------|-------------------------------------|------|----------------------------------------|-------------------------------------|------|--------|
| Ti   | 4                                      | 1.54                                | Zr   | 4                                      | 1.33                                | Hf   | 4                                      | 1.32                                | O    | 3.44   |
| V    | 5                                      | 1.63                                | Nb   | 5                                      | 1.59                                | Ta   | 5                                      | 1.51                                | C    | 2.55   |
| Cr   | 6                                      | 1.66                                | Mo   | 6                                      | 2.16                                | W    | 6                                      | 2.36                                | N    | 3.04   |
| Mn   | 7                                      | 1.55                                | Tc   | 7                                      | 1.91                                | Re   | 7                                      | 1.93                                |      |        |
| Fe   | 8                                      | 1.83                                | Ru   | 8                                      | 2.20                                | Os   | 8                                      | 2.18                                |      |        |
| Co   | 9                                      | 1.88                                | Rh   | 9                                      | 2.28                                | Ir   | 9                                      | 2.20                                |      |        |
| Ni   | 10                                     | 1.92                                | Pd   | 10                                     | 2.20                                | Pt   | 10                                     | 2.28                                |      |        |
| Cu   | 11                                     | 1.90                                | Ag   | 11                                     | 1.93                                | Au   | 11                                     | 2.54                                |      |        |

**Table S3.** Adsorption free energies of O\* ( $\Delta G_{O^*}$ , eV), \*OH ( $\Delta G_{*OH}$ , eV) and \*OOH ( $\Delta G_{*OOH}$ , eV) reaction intermediates as well as the composition descriptor  $\zeta = \varphi_M^{\text{anchored}} \times \chi_O^{\text{ads}} / (\chi_M^{\text{anchored}} + \chi^{\text{MXene}})$  on M-Ti<sub>2</sub>CO<sub>2</sub> (M = 3d, 4d and 5d transition-metal).

| Active center                      | $\zeta$ | $\Delta G_{O^*}$ | $\Delta G_{*OH}$ | $\Delta G_{*OOH}$ |
|------------------------------------|---------|------------------|------------------|-------------------|
| Ti-Ti <sub>2</sub> CO <sub>2</sub> | 3.40    | -1.29            | -1.78            | 1.57              |
| V-Ti <sub>2</sub> CO <sub>2</sub>  | 4.16    | -1.36            | -1.11            | 2.36              |
| Cr-Ti <sub>2</sub> CO <sub>2</sub> | 4.96    | -1.09            | -0.80            | 2.30              |
| Mn-Ti <sub>2</sub> CO <sub>2</sub> | 5.94    | 0.88             | 0.89             | 3.84              |
| Fe-Ti <sub>2</sub> CO <sub>2</sub> | 6.35    | 1.41             | 0.00             | 3.31              |
| Co-Ti <sub>2</sub> CO <sub>2</sub> | 7.07    | 1.39             | 0.24             | 3.39              |
| Ni-Ti <sub>2</sub> CO <sub>2</sub> | 7.78    | 2.09             | 0.97             | 3.83              |
| Cu-Ti <sub>2</sub> CO <sub>2</sub> | 8.60    | 2.78             | 1.25             | 3.76              |
| Zr-Ti <sub>2</sub> CO <sub>2</sub> | 3.59    | -1.37            | -2.33            | 1.55              |
| Nb-Ti <sub>2</sub> CO <sub>2</sub> | 4.20    | -1.94            | -1.66            | 1.95              |
| Mo-Ti <sub>2</sub> CO <sub>2</sub> | 4.43    | -1.51            | -0.68            | 1.88              |
| Tc-Ti <sub>2</sub> CO <sub>2</sub> | 5.46    | -1.10            | -0.50            | 2.33              |
| Ru-Ti <sub>2</sub> CO <sub>2</sub> | 5.85    | 0.60             | 0.76             | 3.45              |
| Rh-Ti <sub>2</sub> CO <sub>2</sub> | 6.47    | 1.68             | 0.81             | 3.68              |
| Pd-Ti <sub>2</sub> CO <sub>2</sub> | 7.32    | 2.80             | 1.81             | 4.05              |
| Ag-Ti <sub>2</sub> CO <sub>2</sub> | 8.54    | 3.60             | 1.79             | 4.37              |
| Hf-Ti <sub>2</sub> CO <sub>2</sub> | 3.60    | -1.19            | -2.54            | 1.35              |
| Ta-Ti <sub>2</sub> CO <sub>2</sub> | 4.29    | -2.44            | -2.26            | 1.53              |
| W-Ti <sub>2</sub> CO <sub>2</sub>  | 4.25    | -1.87            | -1.06            | 1.77              |
| Re-Ti <sub>2</sub> CO <sub>2</sub> | 5.43    | -1.39            | -0.72            | 2.01              |
| Os-Ti <sub>2</sub> CO <sub>2</sub> | 5.88    | -0.56            | 0.28             | 2.79              |
| Ir-Ti <sub>2</sub> CO <sub>2</sub> | 6.58    | 0.65             | 0.48             | 2.90              |
| Pt-Ti <sub>2</sub> CO <sub>2</sub> | 7.19    | 1.53             | 1.26             | 3.24              |
| Au-Ti <sub>2</sub> CO <sub>2</sub> | 7.50    | 2.69             | 1.68             | 3.14              |

**Table S4.** Adsorption free energies of O\* ( $\Delta G_{O^*}$ , eV), \*OH ( $\Delta G_{*OH}$ , eV) and \*OOH ( $\Delta G_{*OOH}$ , eV) reaction intermediates as well as the composition descriptor  $\zeta = \varphi_M^{\text{anchored}} \times \chi_O^{\text{ads}} / (\chi_M^{\text{anchored}} + \chi^{\text{MXene}})$  on M-Ti<sub>3</sub>C<sub>2</sub>O<sub>2</sub> (M = 3d, 4d and 5d transition-metal).

| Active center                                    | $\zeta$ | $\Delta G_{O^*}$ | $\Delta G_{*OH}$ | $\Delta G_{*OOH}$ |
|--------------------------------------------------|---------|------------------|------------------|-------------------|
| Ti-Ti <sub>3</sub> C <sub>2</sub> O <sub>2</sub> | 3.52    | -1.14            | -1.86            | 1.79              |
| V-Ti <sub>3</sub> C <sub>2</sub> O <sub>2</sub>  | 4.30    | -1.41            | -1.25            | 1.81              |
| Cr-Ti <sub>3</sub> C <sub>2</sub> O <sub>2</sub> | 5.12    | -0.87            | -0.14            | 2.37              |
| Mn-Ti <sub>3</sub> C <sub>2</sub> O <sub>2</sub> | 6.14    | 1.08             | 0.93             | 3.89              |
| Fe-Ti <sub>3</sub> C <sub>2</sub> O <sub>2</sub> | 6.55    | 1.26             | -0.20            | 3.12              |
| Co-Ti <sub>3</sub> C <sub>2</sub> O <sub>2</sub> | 7.28    | 1.60             | 0.45             | 3.56              |
| Ni-Ti <sub>3</sub> C <sub>2</sub> O <sub>2</sub> | 8.02    | 1.90             | 0.70             | 3.73              |
| Cu-Ti <sub>3</sub> C <sub>2</sub> O <sub>2</sub> | 8.86    | 2.79             | 1.42             | 3.72              |
| Zr-Ti <sub>3</sub> C <sub>2</sub> O <sub>2</sub> | 3.72    | -1.18            | -2.30            | 1.09              |
| Nb-Ti <sub>3</sub> C <sub>2</sub> O <sub>2</sub> | 4.34    | -2.12            | -1.78            | 1.65              |
| Mo-Ti <sub>3</sub> C <sub>2</sub> O <sub>2</sub> | 4.55    | -1.77            | -0.95            | 1.53              |
| Tc-Ti <sub>3</sub> C <sub>2</sub> O <sub>2</sub> | 5.62    | -1.11            | -0.29            | 2.20              |
| Ru-Ti <sub>3</sub> C <sub>2</sub> O <sub>2</sub> | 6.02    | 0.18             | 0.59             | 3.03              |
| Rh-Ti <sub>3</sub> C <sub>2</sub> O <sub>2</sub> | 6.66    | 1.70             | 1.01             | 3.90              |
| Pd-Ti <sub>3</sub> C <sub>2</sub> O <sub>2</sub> | 7.53    | 2.59             | 1.95             | 3.91              |
| Ag-Ti <sub>3</sub> C <sub>2</sub> O <sub>2</sub> | 8.80    | 3.79             | 2.00             | 4.34              |
| Hf-Ti <sub>3</sub> C <sub>2</sub> O <sub>2</sub> | 3.73    | -0.96            | -2.55            | 0.89              |
| Ta-Ti <sub>3</sub> C <sub>2</sub> O <sub>2</sub> | 4.43    | -2.46            | -2.38            | 1.44              |
| W-Ti <sub>3</sub> C <sub>2</sub> O <sub>2</sub>  | 4.36    | -2.27            | -1.28            | 1.12              |
| Re-Ti <sub>3</sub> C <sub>2</sub> O <sub>2</sub> | 5.60    | -1.38            | -0.54            | 1.93              |
| Os-Ti <sub>3</sub> C <sub>2</sub> O <sub>2</sub> | 6.05    | -0.79            | -0.08            | 2.48              |
| Ir-Ti <sub>3</sub> C <sub>2</sub> O <sub>2</sub> | 6.77    | 0.51             | 0.85             | 2.93              |
| Pt-Ti <sub>3</sub> C <sub>2</sub> O <sub>2</sub> | 7.40    | 1.44             | 0.94             | 3.04              |
| Au-Ti <sub>3</sub> C <sub>2</sub> O <sub>2</sub> | 7.70    | 2.69             | 1.71             | 3.12              |

**Table S5.** Adsorption free energies of O\* ( $\Delta G_{O^*}$ , eV), \*OH ( $\Delta G_{*OH}$ , eV) and \*OOH ( $\Delta G_{*OOH}$ , eV) reaction intermediates as well as the composition descriptor  $\zeta = \varphi_M^{\text{anchored}} \times \chi_O^{\text{ads}} / (\chi_M^{\text{anchored}} + \chi^{\text{MXene}})$  on M-Ti<sub>3</sub>CNO<sub>2</sub> (M = 3d, 4d and 5d transition-metal).

| Active center                       | $\zeta$ | $\Delta G_{O^*}$ | $\Delta G_{*OH}$ | $\Delta G_{*OOH}$ |
|-------------------------------------|---------|------------------|------------------|-------------------|
| Ti-Ti <sub>3</sub> CNO <sub>2</sub> | 3.46    | -1.24            | -1.89            | 1.76              |
| V-Ti <sub>3</sub> CNO <sub>2</sub>  | 4.22    | -1.56            | -1.22            | 2.20              |
| Cr-Ti <sub>3</sub> CNO <sub>2</sub> | 5.03    | -0.87            | -0.64            | 2.52              |
| Mn-Ti <sub>3</sub> CNO <sub>2</sub> | 6.03    | 1.14             | 0.08             | 4.07              |
| Fe-Ti <sub>3</sub> CNO <sub>2</sub> | 6.44    | 1.50             | -0.25            | 3.10              |
| Co-Ti <sub>3</sub> CNO <sub>2</sub> | 7.16    | 1.52             | 0.38             | 3.48              |
| Ni-Ti <sub>3</sub> CNO <sub>2</sub> | 7.89    | 1.83             | 0.62             | 3.64              |
| Cu-Ti <sub>3</sub> CNO <sub>2</sub> | 8.72    | 2.81             | 1.30             | 3.76              |
| Zr-Ti <sub>3</sub> CNO <sub>2</sub> | 3.65    | -1.28            | -2.34            | 1.04              |
| Nb-Ti <sub>3</sub> CNO <sub>2</sub> | 4.27    | -2.20            | -1.95            | 1.72              |
| Mo-Ti <sub>3</sub> CNO <sub>2</sub> | 4.49    | -1.93            | -1.10            | 1.39              |
| Tc-Ti <sub>3</sub> CNO <sub>2</sub> | 5.53    | -1.14            | -0.28            | 2.22              |
| Ru-Ti <sub>3</sub> CNO <sub>2</sub> | 5.93    | 0.10             | 0.70             | 3.04              |
| Rh-Ti <sub>3</sub> CNO <sub>2</sub> | 6.56    | 1.62             | 0.98             | 3.95              |
| Pd-Ti <sub>3</sub> CNO <sub>2</sub> | 7.41    | 2.50             | 1.64             | 3.81              |
| Ag-Ti <sub>3</sub> CNO <sub>2</sub> | 8.66    | 3.76             | 1.96             | 4.50              |
| Hf-Ti <sub>3</sub> CNO <sub>2</sub> | 3.66    | -1.04            | -2.57            | 0.84              |
| Ta-Ti <sub>3</sub> CNO <sub>2</sub> | 4.35    | -2.49            | -2.49            | 1.00              |
| W-Ti <sub>3</sub> CNO <sub>2</sub>  | 4.30    | -2.41            | -1.43            | 0.87              |
| Re-Ti <sub>3</sub> CNO <sub>2</sub> | 5.51    | -1.43            | -0.51            | 1.90              |
| Os-Ti <sub>3</sub> CNO <sub>2</sub> | 5.95    | -0.79            | 0.13             | 2.50              |
| Ir-Ti <sub>3</sub> CNO <sub>2</sub> | 6.67    | 0.33             | 0.60             | 2.78              |
| Pt-Ti <sub>3</sub> CNO <sub>2</sub> | 7.29    | 1.33             | 0.81             | 2.88              |
| Au-Ti <sub>3</sub> CNO <sub>2</sub> | 7.60    | 2.66             | 1.70             | 3.17              |



**Table S6.** O\* adsorption free energy ( $\Delta G_{O^*}$ , eV) of previously reported ORR catalysts possessing comparable or even better catalytic activity compared to commercial Pt/C.

| system                        | $\Delta G_{O^*}$ | References                               |
|-------------------------------|------------------|------------------------------------------|
| Pt(111)                       | 1.62             | Nat. Catal., 2018, 1, 339-348            |
| Fe-Pc                         | 1.88             | Nanoscale, 2015, 7, 11633-11641          |
| PtTe                          | 1.89             | J. Am. Chem. Soc. 2018, 140, 12732-12735 |
| Fe-pyridine-N <sub>4</sub> -C | 1.90             | Nat. Catal., 2018, 1, 339-348            |
| Co-pyridine-N <sub>4</sub> -C | 2.59             | Nat. Catal., 2018, 1, 339-348            |
| Fe-pyrrole-N <sub>4</sub> -C  | 2.05             | Nat. Catal., 2018, 1, 339-348            |
| Tc-pyrrole-N <sub>4</sub> -C  | 1.73             | Nat. Catal., 2018, 1, 339-348            |
| Os-pyrrole-N <sub>4</sub> -C  | 2.31             | Nat. Catal., 2018, 1, 339-348            |

**Table S7.** Bond length of metal-oxygen  $l(M-O)$  (Å) and activated O-O  $l(O-O)$  (Å) of O<sub>2</sub> molecule adsorption on M-Ti<sub>2</sub>CO<sub>2</sub> (M = 3d transition-metal) active sites.

| system                             | $l_{M-O}$ | $l_{O-O}$ |
|------------------------------------|-----------|-----------|
| Ti-Ti <sub>2</sub> CO <sub>2</sub> | 1.82      | 1.46      |
| V-Ti <sub>2</sub> CO <sub>2</sub>  | 1.79      | 1.45      |
| Cr-Ti <sub>2</sub> CO <sub>2</sub> | 1.77      | 1.43      |
| Mn-Ti <sub>2</sub> CO <sub>2</sub> | 1.84      | 1.40      |
| Fe-Ti <sub>2</sub> CO <sub>2</sub> | 1.71      | 1.27      |
| Co-Ti <sub>2</sub> CO <sub>2</sub> | 1.76      | 1.27      |
| Ni-Ti <sub>2</sub> CO <sub>2</sub> | 1.82      | 1.28      |
| Cu-Ti <sub>2</sub> CO <sub>2</sub> | 1.86      | 1.28      |

**Table S8.** Adsorption free energy of OH ( $\Delta G_{\text{OH}}^*$ , eV), O ( $\Delta G_{\text{O}}^*$ , eV), OOH ( $\Delta G_{\text{OOH}}^*$ , eV) and reaction free energy ( $\Delta G_1$ ,  $\Delta G_2$ ,  $\Delta G_3$  and  $\Delta G_4$ , eV vs. RHE) of elementary step as well as overpotential ( $\eta$ , V) for ORR at  $U_{\text{RHE}} = 0$  V proceeded on M-MXenes (M = Cu, Pd, Ag, Pt and Au).

| Active center                                    | $\Delta G_{\text{OOH}}^*$ | $\Delta G_{\text{O}}^*$ | $\Delta G_{\text{OH}}^*$ | $\Delta G_1$ | $\Delta G_2$ | $\Delta G_3$ | $\Delta G_4$ | $\eta$ |
|--------------------------------------------------|---------------------------|-------------------------|--------------------------|--------------|--------------|--------------|--------------|--------|
| Ideal                                            | 3.69                      | 2.46                    | 1.23                     | -1.23        | -1.23        | -1.23        | -1.23        | 0      |
| Pt/C <sup>5</sup>                                | -                         | -                       | -                        | -            | -            | -            | -            | 0.40   |
| Pt(111) <sup>1</sup>                             | 4.10                      | 1.62                    | 0.80                     | -0.82        | -2.48        | -0.82        | -0.80        | 0.43   |
| Cu-Ti <sub>2</sub> CO <sub>2</sub>               | 3.76                      | 2.78                    | 1.25                     | -1.16        | -0.98        | -1.53        | -1.25        | 0.25   |
| Pd-Ti <sub>2</sub> CO <sub>2</sub>               | 4.05                      | 2.80                    | 1.81                     | -0.87        | -1.25        | -0.99        | -1.81        | 0.36   |
| Ag-Ti <sub>2</sub> CO <sub>2</sub>               | 4.37                      | 3.60                    | 1.79                     | -0.55        | -0.78        | -1.81        | -1.79        | 0.68   |
| Pt-Ti <sub>2</sub> CO <sub>2</sub>               | 3.28                      | 1.53                    | 1.26                     | -1.64        | -1.75        | -0.27        | -1.26        | 0.96   |
| Au-Ti <sub>2</sub> CO <sub>2</sub>               | 3.14                      | 2.69                    | 1.68                     | -1.78        | -0.45        | -1.01        | -1.68        | 0.78   |
| Cu-Ti <sub>3</sub> C <sub>2</sub> O <sub>2</sub> | 3.72                      | 2.79                    | 1.42                     | -1.20        | -0.93        | -1.37        | -1.42        | 0.30   |
| Pd-Ti <sub>3</sub> C <sub>2</sub> O <sub>2</sub> | 3.91                      | 2.59                    | 1.95                     | -1.01        | -1.32        | -0.64        | -1.95        | 0.59   |
| Ag-Ti <sub>3</sub> C <sub>2</sub> O <sub>2</sub> | 4.34                      | 3.79                    | 2.00                     | -0.58        | -0.54        | -1.79        | -2.00        | 0.69   |
| Pt-Ti <sub>3</sub> C <sub>2</sub> O <sub>2</sub> | 3.04                      | 1.44                    | 0.94                     | -1.88        | -1.61        | -0.49        | -0.94        | 0.74   |
| Au-Ti <sub>3</sub> C <sub>2</sub> O <sub>2</sub> | 3.12                      | 2.69                    | 1.71                     | -1.80        | -0.43        | -0.97        | -1.71        | 0.80   |
| Cu-Ti <sub>3</sub> CNO <sub>2</sub>              | 3.76                      | 2.81                    | 1.30                     | -1.16        | -0.95        | -1.51        | -1.30        | 0.28   |
| Pd-Ti <sub>3</sub> CNO <sub>2</sub>              | 3.81                      | 2.50                    | 1.64                     | -1.11        | -1.31        | -0.87        | -1.64        | 0.36   |
| Ag-Ti <sub>3</sub> CNO <sub>2</sub>              | 4.50                      | 3.76                    | 1.96                     | -0.42        | -0.74        | -1.80        | -1.96        | 0.81   |
| Pt-Ti <sub>3</sub> CNO <sub>2</sub>              | 2.88                      | 1.33                    | 0.81                     | -2.04        | -1.55        | -0.51        | -0.81        | 0.72   |
| Au-Ti <sub>3</sub> CNO <sub>2</sub>              | 3.17                      | 2.66                    | 1.70                     | -1.75        | -0.52        | -0.96        | -1.70        | 0.71   |

**Table S9.** Binding energies ( $E_b$ , eV) of H<sub>2</sub>O, CO and O<sub>2</sub> adsorption, wherein H<sub>2</sub>O-Cu-Ti<sub>2</sub>CO<sub>2</sub> (CO-Cu-Ti<sub>2</sub>CO<sub>2</sub>) means that H<sub>2</sub>O (CO) is first adsorbed, and then the substrate continues to adsorb another molecule.

| system                                              | adsorbed molecule | $E_b$ |
|-----------------------------------------------------|-------------------|-------|
| Cu-Ti <sub>2</sub> CO <sub>2</sub>                  | O <sub>2</sub>    | -0.79 |
|                                                     | H <sub>2</sub> O  | -0.82 |
|                                                     | CO                | -1.55 |
| H <sub>2</sub> O-Cu-Ti <sub>2</sub> CO <sub>2</sub> | O <sub>2</sub>    | -0.35 |
| CO-Cu-Ti <sub>2</sub> CO <sub>2</sub>               | O <sub>2</sub>    | 0.06  |
| O <sub>2</sub> -Cu-Ti <sub>2</sub> CO <sub>2</sub>  | O <sub>2</sub>    | -0.05 |
|                                                     | H <sub>2</sub> O  | -0.37 |
|                                                     | CO                | -0.69 |

**Table S10.** Total energy of a metal atom in the bulk with the most stable crystal phase ( $\mu_M$ , eV/atom) and a single metal atom in the vacuum ( $E_M^{\text{single}}$ , eV/atom), as well as the metal cohesive energy ( $E_{\text{coh}} = \mu_M - E_M^{\text{single}}$ , eV/atom). The values of  $E_{\text{coh}}$  are compared to the available PBE results and experimental values taken from Ref. [6].

| Metals | Crystal phases | $E_M^{\text{bulk}}$ | $E_M^{\text{single}}$ | $E_{\text{coh}}$ | PBE   | Exp.  |
|--------|----------------|---------------------|-----------------------|------------------|-------|-------|
| Ti     | hcp            | -7.80               | -2.42                 | -5.38            | -     | -     |
| V      | bcc            | -8.96               | -3.56                 | -5.40            | -     | -     |
| Cr     | bcc            | -9.51               | -5.43                 | -4.08            | -     | -     |
| Mn     | bcc            | -8.85               | -5.16                 | -3.69            | -     | -     |
| Fe     | bcc            | -8.25               | -3.25                 | -5.00            | -     | -     |
| Co     | hcp            | -7.03               | -1.72                 | -5.31            | -     | -     |
| Ni     | fcc            | -5.49               | -0.65                 | -4.84            | -     | -     |
| Cu     | fcc            | -3.83               | -0.24                 | -3.59            | -3.48 | -3.52 |
| Zr     | hcp            | -8.52               | -2.28                 | -6.24            | -     | -     |
| Nb     | bcc            | -10.09              | -3.15                 | -6.94            | -     | -     |
| Mo     | bcc            | -10.92              | -4.61                 | -6.31            | -     | -     |
| Tc     | hcp            | -10.35              | -3.31                 | -7.04            | -     | -     |
| Ru     | hcp            | -9.23               | -1.50                 | -7.73            | -     | -     |
| Rh     | fcc            | -7.26               | -1.24                 | -6.02            | -5.72 | -5.78 |
| Pd     | fcc            | -5.21               | -1.50                 | -3.71            | -3.71 | -3.92 |
| Ag     | fcc            | -2.70               | -0.20                 | -2.50            | -2.52 | -2.97 |
| Hf     | hcp            | -9.93               | -3.52                 | -6.41            | -     | -     |
| Ta     | bcc            | -11.81              | -3.58                 | -8.23            | -     | -     |
| W      | bcc            | -13.02              | -4.54                 | -8.48            | -     | -     |
| Re     | hcp            | -12.39              | -4.64                 | -7.75            | -     | -     |
| Os     | hcp            | -11.23              | -2.93                 | -8.30            | -     | -     |
| Ir     | fcc            | -8.84               | -1.51                 | -7.33            | -     | -     |
| Pt     | fcc            | -6.09               | -0.53                 | -5.56            | -     | -     |
| Au     | fcc            | -3.21               | -0.19                 | -3.02            | -     | -     |

**Table S11.** Diffusion barrier of Ti, V, Fe, Co, Ni and Cu single-atoms on  $\text{Ti}_2\text{CO}_2$  surface.

| system                       | diffusion barrier (eV) |
|------------------------------|------------------------|
| Ti- $\text{Ti}_2\text{CO}_2$ | 1.43                   |
| V- $\text{Ti}_2\text{CO}_2$  | 1.15                   |
| Fe- $\text{Ti}_2\text{CO}_2$ | 0.86                   |
| Co- $\text{Ti}_2\text{CO}_2$ | 0.70                   |
| Ni- $\text{Ti}_2\text{CO}_2$ | 0.75                   |

Cu-  
Ti<sub>2</sub>CO<sub>2</sub> 0.25

---

## Figures

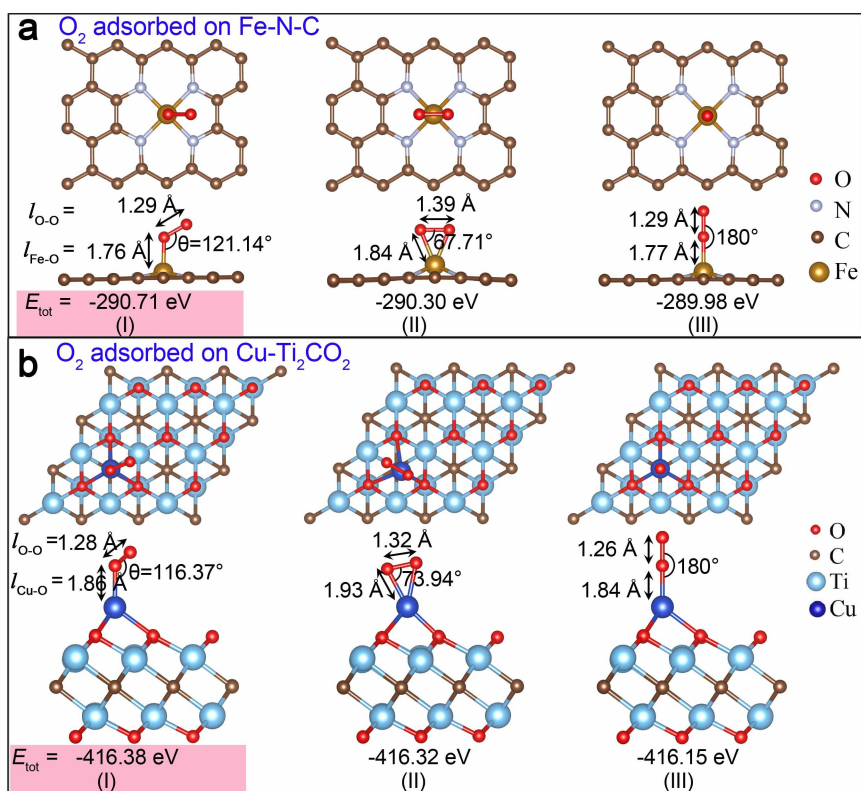

**Fig. S1** Configuration test for O<sub>2</sub> adsorbed on the active sites of (a) Fe-N-C and (b) Cu-Ti<sub>2</sub>CO<sub>2</sub>, where the optimized total energy ( $E_{\text{tot}}$ ), the bond length and the bond angle are highlighted. The optimal adsorption configuration is marked with pink.

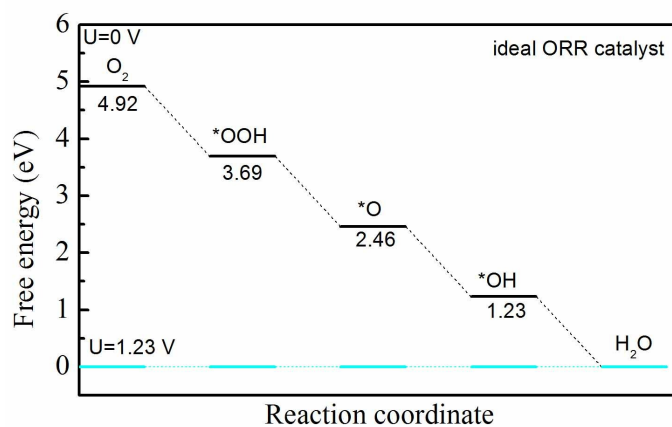

**Fig. S2** Free energy profile of the ORR proceeded on an ideal catalyst at zero electrode potential.

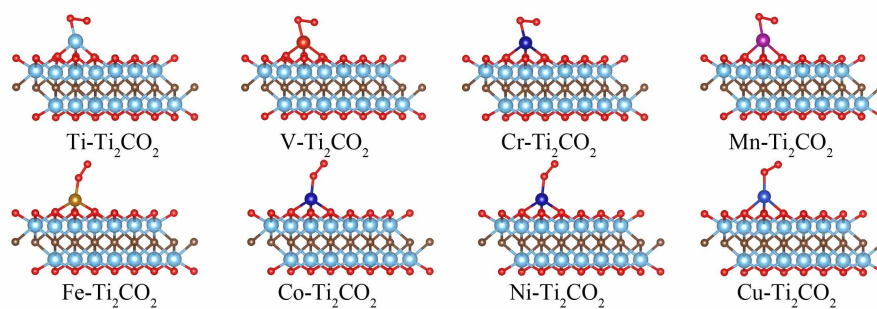

**Fig. S3** The optimized configurations of O<sub>2</sub> molecule adsorption on Ti, V, Cr, Mn, Fe, Co, Ni, Cu anchored Ti<sub>2</sub>CO<sub>2</sub>.

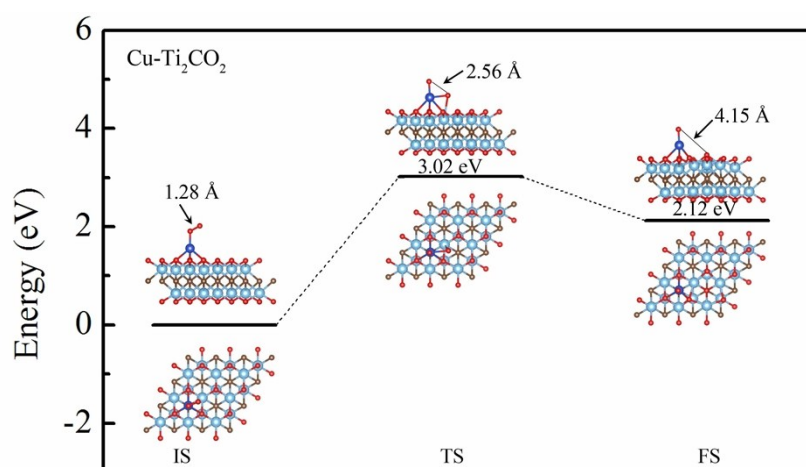

**Fig. S4** Energy profile for the O<sub>2</sub> dissociation reaction on the surface of Cu-Ti<sub>2</sub>CO<sub>2</sub>. The IS, TS, and FS represents initial state, transition state, and final state, respectively.

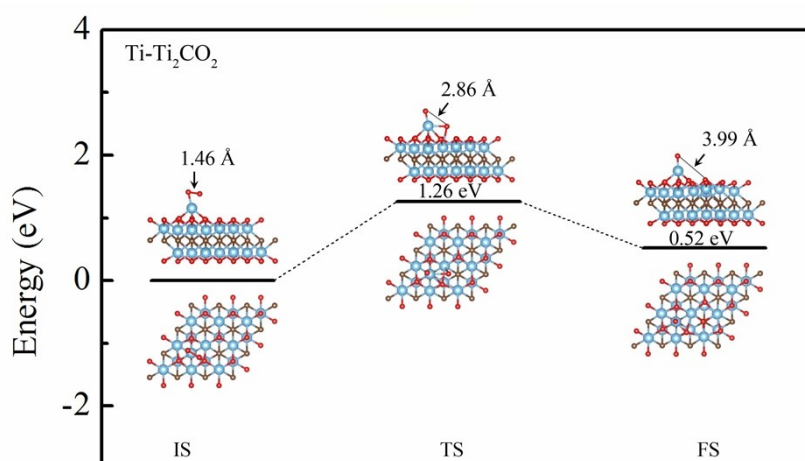

**Fig. S5** Energy profile for the O<sub>2</sub> dissociation reaction on the surface of Ti-Ti<sub>2</sub>CO<sub>2</sub>. The IS, TS, and FS represents initial state, transition state, and final state, respectively.

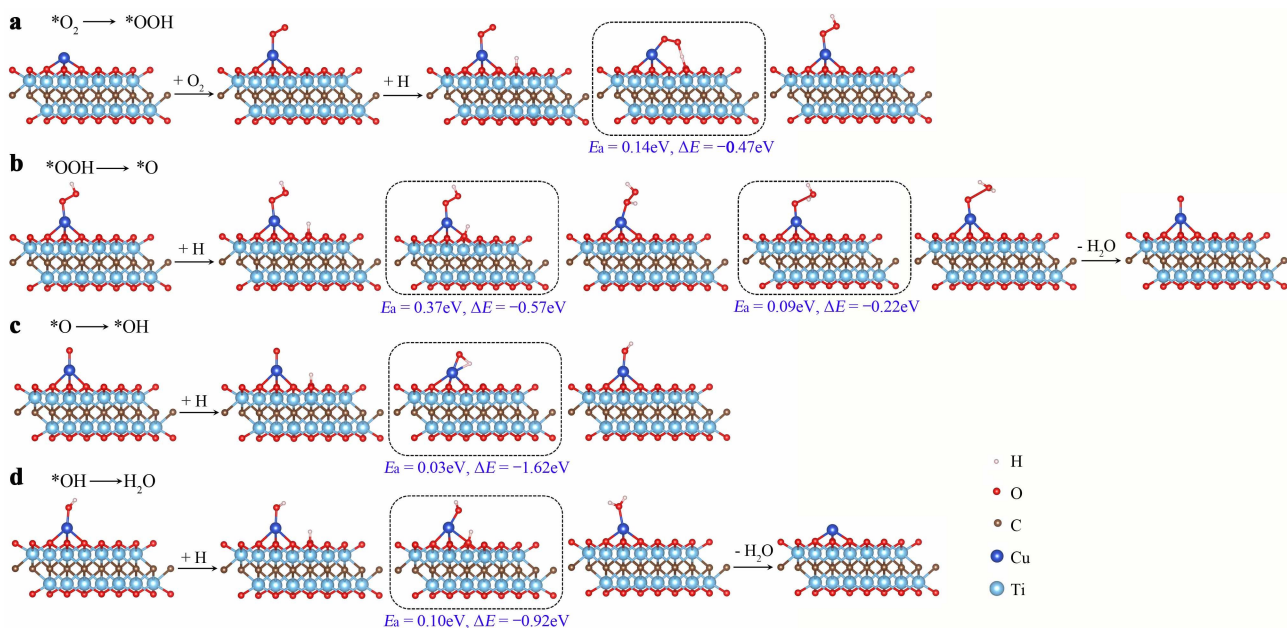

**Fig. S6** Schematic of four elementary steps: (a)  $*\text{OOH}$  formation from the hydrogenation of the adsorbed  $\text{O}_2$  on  $\text{Cu-Ti}_2\text{CO}_2$ . (b) 1<sup>st</sup>  $\text{H}_2\text{O}$  formation from the hydrogenation of  $*\text{OOH}$ , then  $\text{H}_2\text{O}$  release to form  $\text{O}^*$ . (c)  $*\text{OH}$  formation from the hydrogenation of  $\text{O}^*$ . (d) 2<sup>nd</sup>  $\text{H}_2\text{O}$  formation from the hydrogenation of  $*\text{OH}$ , then  $\text{H}_2\text{O}$  release to restore Cu site. The transition state is marked with a rectangular frame. The corresponding activation energy barrier ( $E_a$ ) and reaction energy ( $\Delta E$ , total energy change between product and reactant) are shown below the rectangular frame.

## High selectivity for 4e oxygen reduction

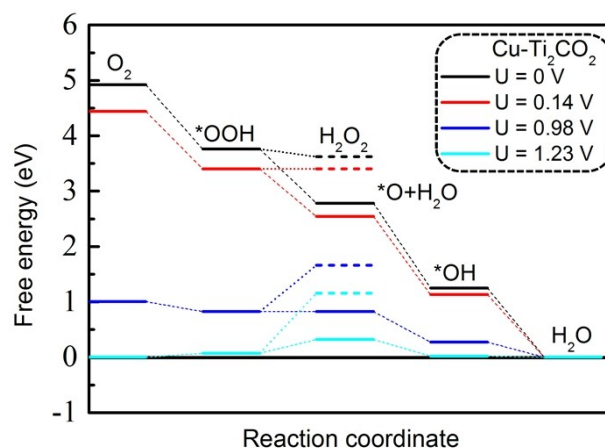

**Fig. S7** Free energy profile of 4e and 2e ORR proceeded on Cu-Ti<sub>2</sub>CO<sub>2</sub>. Starting from the formation of \*OOH intermediate, the solid and dotted lines represent the 4e and 2e reduction pathways, respectively.

In acidic media, the competitive side reaction of 4e ORR is the 2e reduction process, in which the O<sub>2</sub> is reduced to H<sub>2</sub>O<sub>2</sub>. Due to the formation of \*OOH species, it can be further hydrogenated by reacting with another proton. This step can be written as:

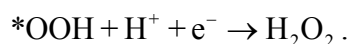

As shown in Fig. S7, although the 2e process on Cu-Ti<sub>2</sub>CO<sub>2</sub> is downhill in the free energy diagram at zero potential ( $U_{\text{RHE}} = 0$ ), the step from \*OOH to H<sub>2</sub>O<sub>2</sub> will turn to be uphill upon the potential higher than 0.14 V. In this case, the 2e reduction pathway is unfavorable. In contrast, at  $0.14 < U < 0.98$  V, all the intermediate steps of 4e reduction process are still downhill in the free energy profile, which is exothermic and energetically favorable. Therefore, the Cu-Ti<sub>2</sub>CO<sub>2</sub> catalyst has high selectivity for the 4e reduction pathway in which O<sub>2</sub> is reduced to H<sub>2</sub>O.



## Effects of H<sub>2</sub>O, CO or multiple O<sub>2</sub> adsorption on the catalytic performance of Cu site

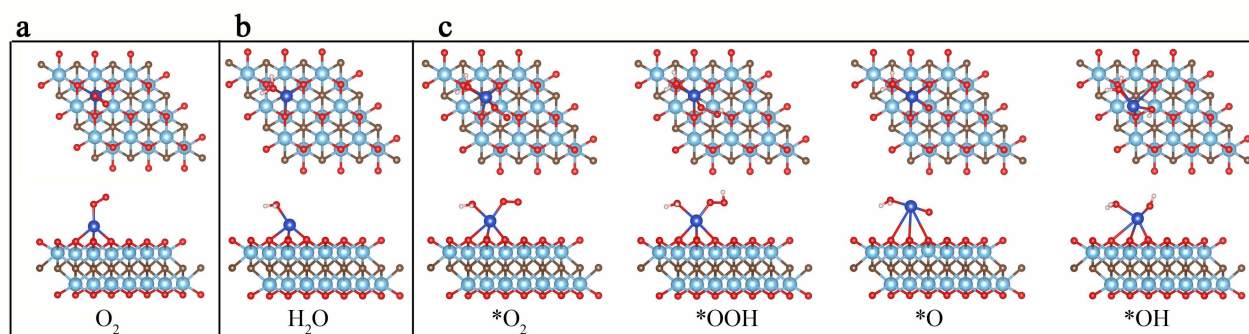

**Fig. S8** Optimized atomic structures of (a) O<sub>2</sub> and (b) H<sub>2</sub>O molecules adsorbed on the active site of Cu-Ti<sub>2</sub>CO<sub>2</sub>. (c) Optimized atomic structures of ORR intermediates on H<sub>2</sub>O attached Cu-Ti<sub>2</sub>CO<sub>2</sub>.

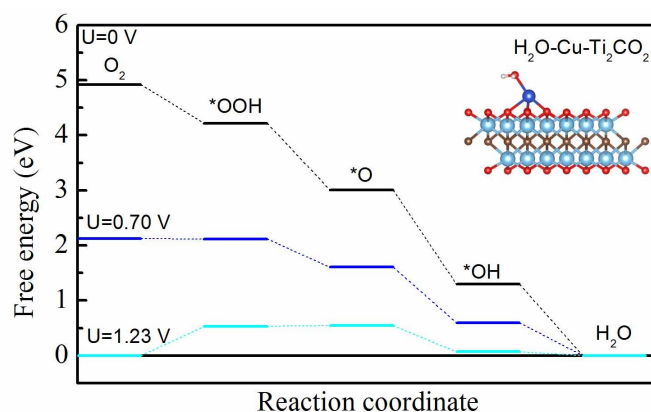

**Fig. S9** Free energy profile of the ORR proceeded on H<sub>2</sub>O-Cu-Ti<sub>2</sub>CO<sub>2</sub>.

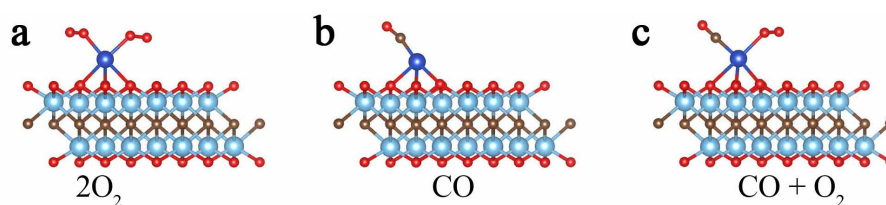

**Fig. S10** Optimized atomic structures of (a) two O<sub>2</sub> molecules, (b) one CO molecule as well as (c) CO and O<sub>2</sub> molecules adsorbed on the active site of Cu-Ti<sub>2</sub>CO<sub>2</sub>.

## The calculation of formation energy using the metal bulk energy

In addition, the formation energy  $E_f$  of metal atom anchored MXenes is calculated using the metal bulk energy, which is given by the following expression,

$$E_f = E_{M-MXenes} - E_{MXenes} - \mu_M, \quad (13)$$

where  $E_{M-MXenes}$  and  $E_{MXenes}$  are the total energies of the whole system and free MXenes, respectively, and  $\mu_M$  is the chemical potential of metal, i.e., the total energy of metal atom in the bulk with the most stable crystal phase, as summarized in Table S10. For comparison, the formation energies  $E_f$  of M-N-C SACs are also calculated according to equation 14, because they have been synthesized and considered as promising ORR catalysts to replace Pt/C, where M-N-C refers to the metal (M) (such as Fe, Co, Ni and Cu) and nitrogen (N) co-doped on the graphene support (C).

$$E_f = E_{M-C-N} - \sum_x n_x \mu_x, \quad (14)$$

where  $E_{M-C-N}$  is the total energy of M-C-N whole system, and  $n_x$  is the number of M, N and C atoms. The corresponding chemical potentials  $\mu_x$  are derived from the metal bulk, gaseous  $N_2$  (-8.31 eV/atom) and graphene (-9.21 eV/atom), respectively. As seen in Fig. S11, the formation energy  $E_f$  of Cu-Ti<sub>2</sub>CO<sub>2</sub> is 1.95 eV. Although the  $E_f$  value is positive, it is comparable to that of the experimentally available Fe-N-C (1.19 eV) and Cu-N-C (1.95 eV) SACs. This indicates that they have comparable stability, further confirming the thermodynamic stability of Cu-Ti<sub>2</sub>CO<sub>2</sub>.

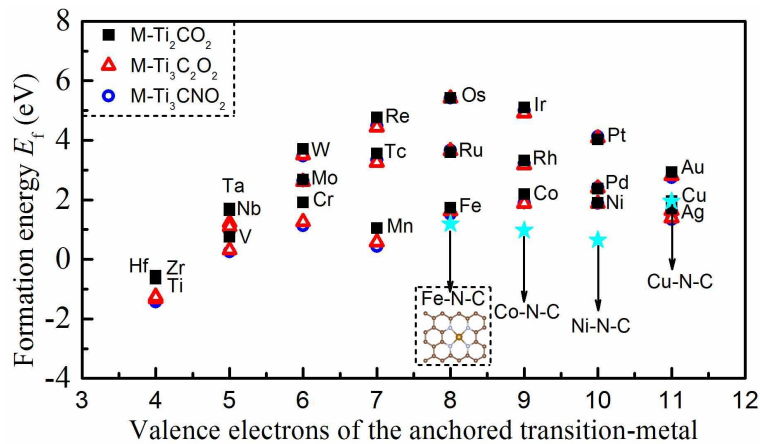

**Fig. S11** Formation energy of metal atom M (M = 3d, 4d and 5d transition-metal) anchored on the surface of Ti<sub>2</sub>CO<sub>2</sub>, Ti<sub>3</sub>C<sub>2</sub>O<sub>2</sub> and Ti<sub>3</sub>CNO<sub>2</sub> (labeled as M-Ti<sub>2</sub>CO<sub>2</sub>, M-Ti<sub>3</sub>C<sub>2</sub>O<sub>2</sub> and M-Ti<sub>3</sub>CNO<sub>2</sub>).

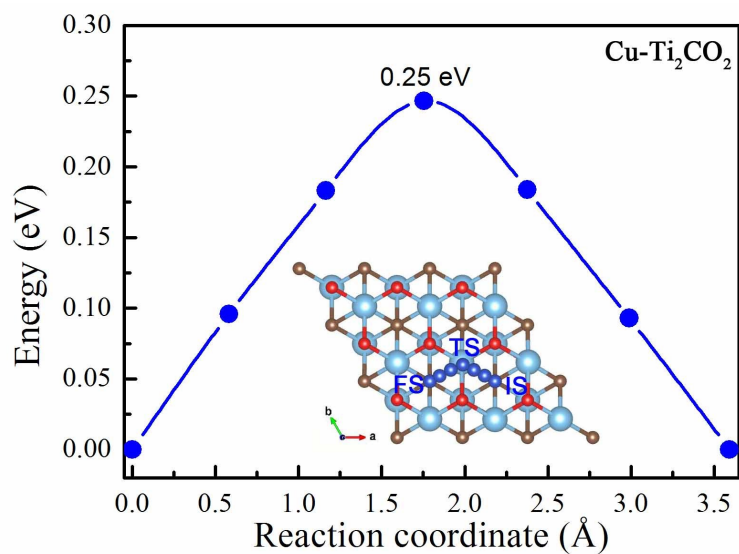

**Fig. S12** Diffusion barrier of Cu atom on the surface of  $\text{Ti}_2\text{CO}_2$ , where the IS, TS and FS represent the initial state (at the hollow site between three neighboring O atoms and on the top site of C atom), transition state (at the top site of Ti) and final state (at the hollow site between three neighboring O atoms and on the top site of C atom), respectively.

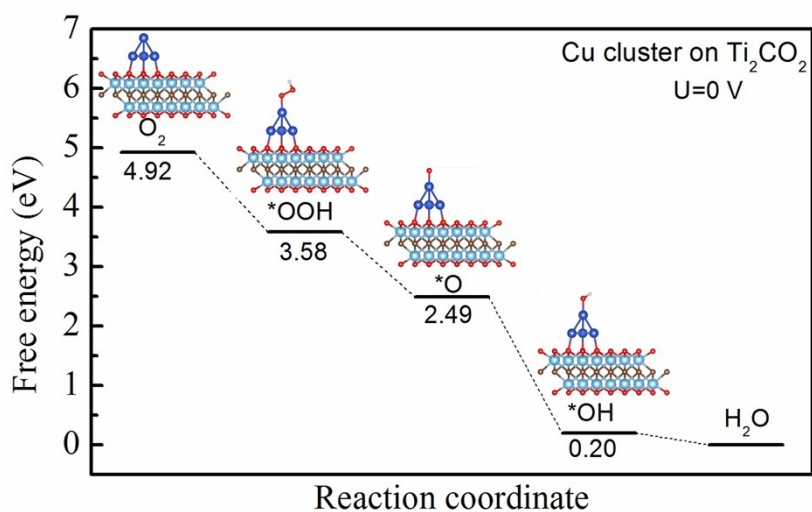

**Fig. S13** Free energy profile of the ORR proceeded on  $\text{Cu}_4\text{-Ti}_2\text{CO}_2$  and the optimized atomic structures of reaction intermediates ( $^*\text{OOH}$ ,  $\text{O}^*$  and  $^*\text{OH}$ ).  $\text{Cu}_4$  corresponds to face-centered cubic Cu with 4 atoms.

## References

1. J. K. Nørskov, J. Rossmeisl, A. Logadottir, L. Lindqvist, J. R. Kitchin, T. Bligaard and H. Jónsson, *J. Phys. Chem. B*, 2004, **108**, 17886-17892.
2. H. Xu, D. Cheng, D. Cao and X. C. Zeng, *Nat. Catal.*, 2018, **1**, 339-348.
3. D. R. Stull and H. Prophet, *JANAF thermochemical tables*, U.S. National Bureau of Standards, Washington, DC, 1971.
4. J. Rossmeisl, Z. W. Qu, H. Zhu, G. J. Kroes and J. K. Nørskov, *J. Electroanal. Chem.*, 2007, **607**, 83-89.
5. Y. Chen, S. Ji, S. Zhao, W. Chen, J. Dong, W.-C. Cheong, R. Shen, X. Wen, L. Zheng, A. I. Rykov, S. Cai, H. Tang, Z. Zhuang, C. Chen, Q. Peng, D. Wang and Y. Li, *Nat. Commun.*, 2018, **9**, 5422.
6. G. I. Csonka, J. P. Perdew, A. Ruzsinszky, P. H. T. Philipsen, S. Lebègue, J. Paier, O. A. Vydrov and J. G. Ángyán, *Phys. Rev. B*, 2009, **79**, 155107.
